# Supplementary material for: Endocannabinoid release at ventral hippocampal-amygdala synapses regulates stress-induced behavioral adaptation
Source: PubMed Central journal article supplement — Cell Rep. Author manuscript; Available in PMC 2024 Feb 6. (PMC10846613; doi:10.1016/j.celrep.2023.113027), 2023-09-12
Supplement: NIHMS1933883-supplement-1.pdf [file NIHMS1933883-supplement-1.pdf]

**Cell Reports, Volume 42**

**Supplemental information**

**Endocannabinoid release at ventral  
hippocampal-amygdala synapses regulates  
stress-induced behavioral adaptation**

**Veronika Kondey, Mustafa Najeed, Farhana Yasmin, Amanda Morgan, Niharika Loomba, Keenan Johnson, Danielle N. Adank, Ao Dong, Eric Delpire, Yulong Li, Danny Winder, Brad A. Grueter, and Sachin Patel**

# SUPPLEMENTAL FIGURES

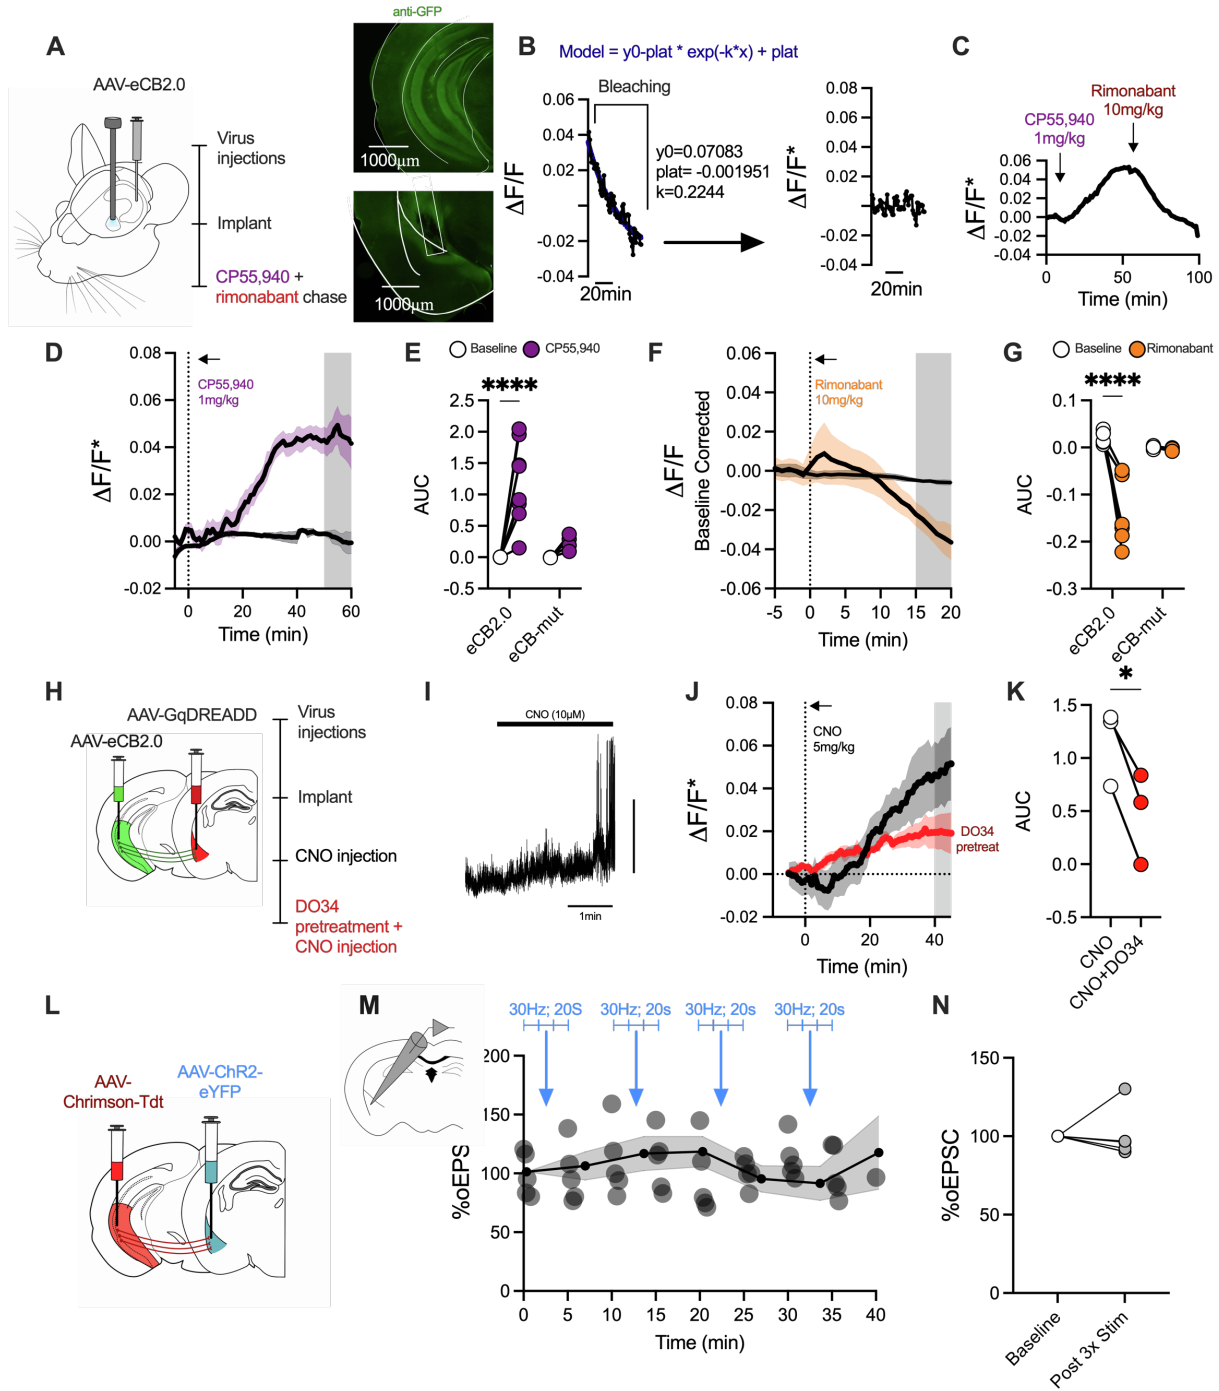

**Figure S1: Validation of eCB2.0 biosensor at vHPC-BLA circuitry (See also Figure 1)**

- A) Schematic of experimental design. Mice were injected with the eCB2.0 (AAV9-hSyn-GRABeCB2.0) or the eCB-mut (AAV9-hSyn-GRABeCB2.0-mutant) into the vHPC and implanted with a fiber optic above the BLA. (Right) Representative image of eCB2.0 in the vHPC and fiber optic implant above the BLA; scale bar represents 1000 $\mu$ m
  - B) Exponential decay model used to correct for photobleaching in long-term recordings. Data that are corrected using model are represented as  $\Delta F/F^*$
  - C) Representative trace of  $\Delta F/F^*$  following pharmacological manipulation of CB1R in eCB2.0 injected mouse
  - D) Time course of  $\Delta F/F^*$  following administration of CP-55,940 (1mg/kg; i.p.) in eCB2.0 (purple) or eCB-mut (gray)
  - E) Quantification of area under the curve (AUC) from (D) in eCB2.0 (n=8) or control (eCB-mut; n=4)
  - F) Time course of  $\Delta F/F$  following administration of CB1R inverse agonist, rimonabant (10mg/kg; i.p.) in mice that express eCB2.0 (orange) or eCB-mut (gray)
  - G) Quantification of AUC from (F) in eCB2.0 (n=6) or eCB-mut mice (n=3)
  - H) Experimental design for chemogenetic BLA activation
  - I) Resulting depolarization and activation of BLA neurons following CNO wash-on using whole-cell patch clamp electrophysiology in acute brain slices
  - J) Time course of  $\Delta F/F^*$  following administration of CNO (5mg/kg; i.p.) in naïve mice (black) or mice pretreated with DAGL inhibitor, DO34 (red)
  - K) Quantification of AUC comparing effects of CNO in naïve or DO34-treated mice (n=3)
  - L) Methodology for assessing DSE *ex vivo* (n=6 cells from 2 mice)
  - M) oEPSC amplitude (%baseline) following 3 rounds of optogenetic stimulation of the BLA at 30Hz for 20s demonstrating individual points, as well as average across time
  - N) Average %oEPSC amplitude (%baseline) after 3 rounds of BLA stimulation (>30min)
- Data were analyzed by 2-Way ANOVA (E,G) or paired student's t-test (K, N); n=number of mice unless otherwise stated.

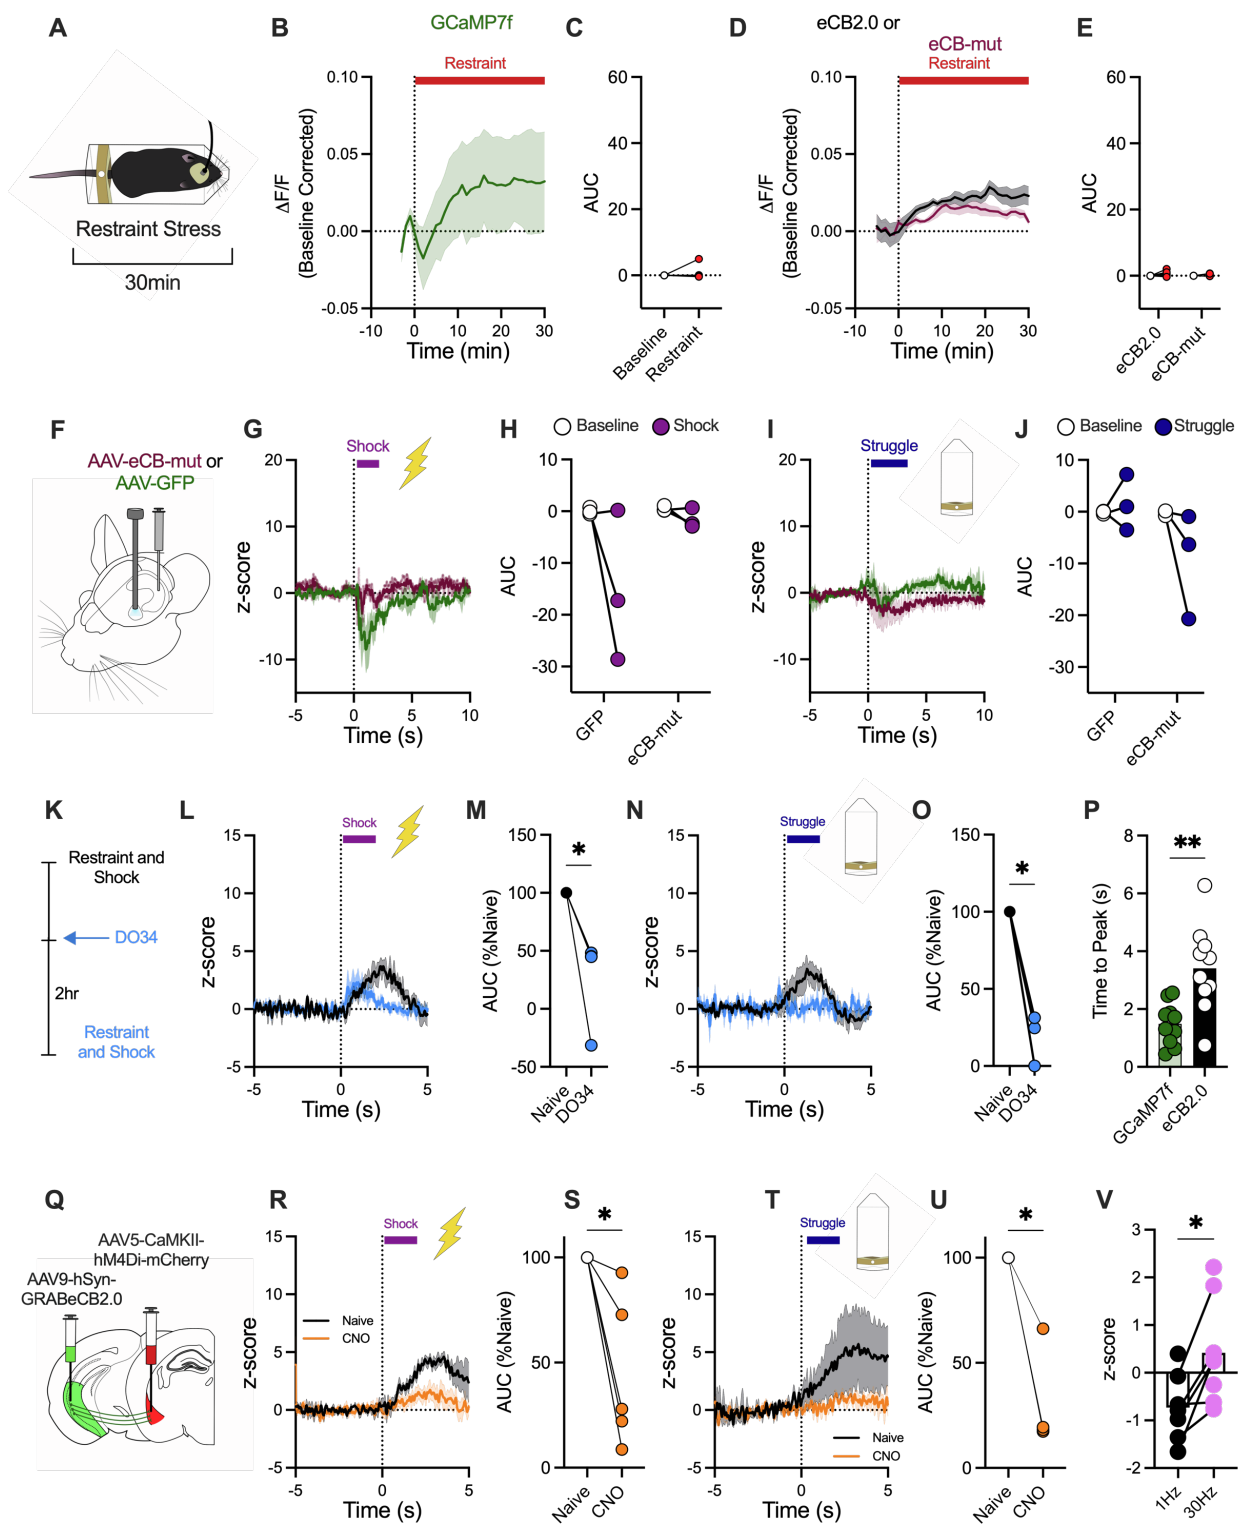

**Figure S2: eCB production and vHPC<sup>eCB2.0</sup> signal in response to stress requires active sensor expression, is dependent on 2-AG synthesis, and requires BLA activity (See also Figure 2)**

- A) Mice were injected with GCaMP7f in the BLA, or eCB2.0 or eCB-mut in the vHPC. All mice were implanted with a fiber optic in the BLA. Mice were exposed to restraint stress for 30 minutes.
  - B) Time course of  $\Delta F/F$  in GCaMP7f mice following onset of restraint stress (n=4)
  - C) Average AUC following restraint session onset
  - D) Time course of  $\Delta F/F$  in eCB2.0 (black) or eCB-mut (purple) mice following onset of restraint stress session (n=8) and eCB-mut mice (n=5)
  - E) AUC following restraint onset in eCB2.0
  - F) Schematic of experimental design. Mice were injected with a virus expressing GFP or eCB-mut in the vHPC and implanted with a fiber optic above the BLA
  - G) Time average of z-score  $\Delta F/F$  in GFP (green; n=3) or eCB-mut (purple; n=3) mice following 2s footshock exposure
  - H) Average AUC following footshock
  - I) Time course of z-score in GFP or eCB-mut mice following struggle onset
  - J) AUC following struggle behavior
  - K) Experimental design for DO34 pretreatment experiments
  - L) Time course of z-score in naïve (black) and DO34-pretreated (green) mice exposed to footshock
  - M) AUC following footshock stress, presented as %naive AUC (n=4)
  - N) Time course of z-score in naïve (black) and DO34-pretreated (green) mice after struggle behavior onset
  - O) Quantification of AUC (%naive) following struggle onset (n=3)
  - P) Quantification of the time for the z-score to reach its peak following onset of footshock or struggle behavior during restraint (GCaMP: n=6; eCB2.0: n=5)
  - Q) Experimental design of chemogenetic BLA inhibition
  - R) Time course of z-score of  $\Delta F/F$  following footshock in naïve mice or mice pretreated with CNO
  - S) Quantification of AUC (%Naive) following footshock comparing naïve mice to CNO-pretreated mice (n=5)
  - T) Time course of z-score of  $\Delta F/F$  following whole body struggle behavior in naïve or CNO-pretreated mice
  - U) AUC (%Naive) following struggle behavior after CNO pretreatment (n=4)
  - V) Average z-score following 5 seconds of BLA stimulation at 1Hz or 30Hz (n=7)
- Data were analyzed by paired student's t-test (C,E,M,O,S,U-V) or 2-Way ANOVA (H,J), or unpaired student's t-test (P). n=number of mice unless otherwise stated.

### vHPC<sup>CB1R</sup>-BLA Deletion

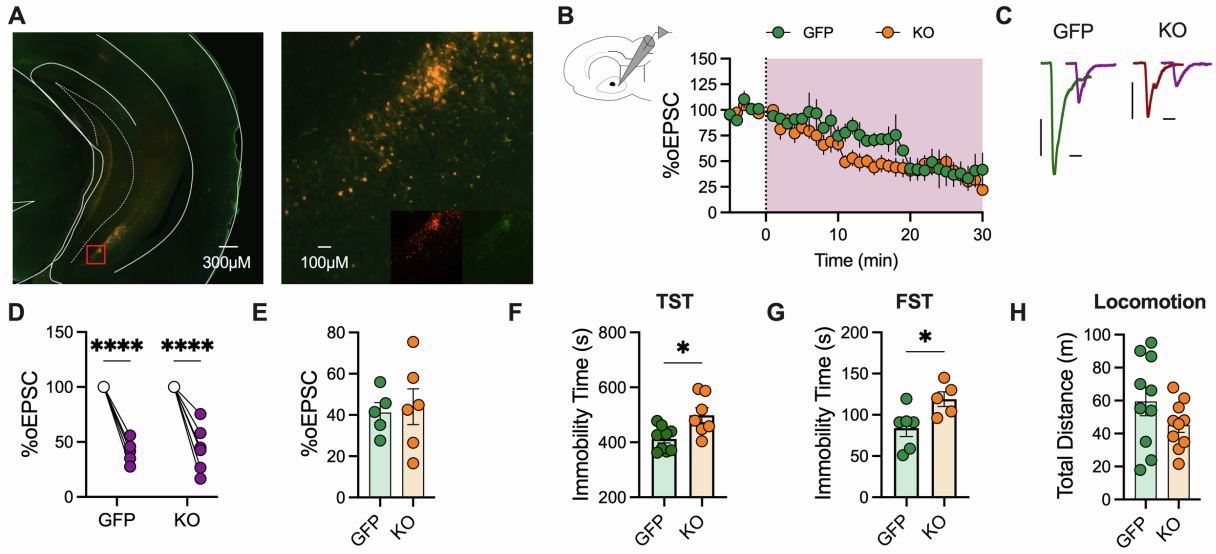

### vHPC<sup>CB1R</sup> Global Deletion

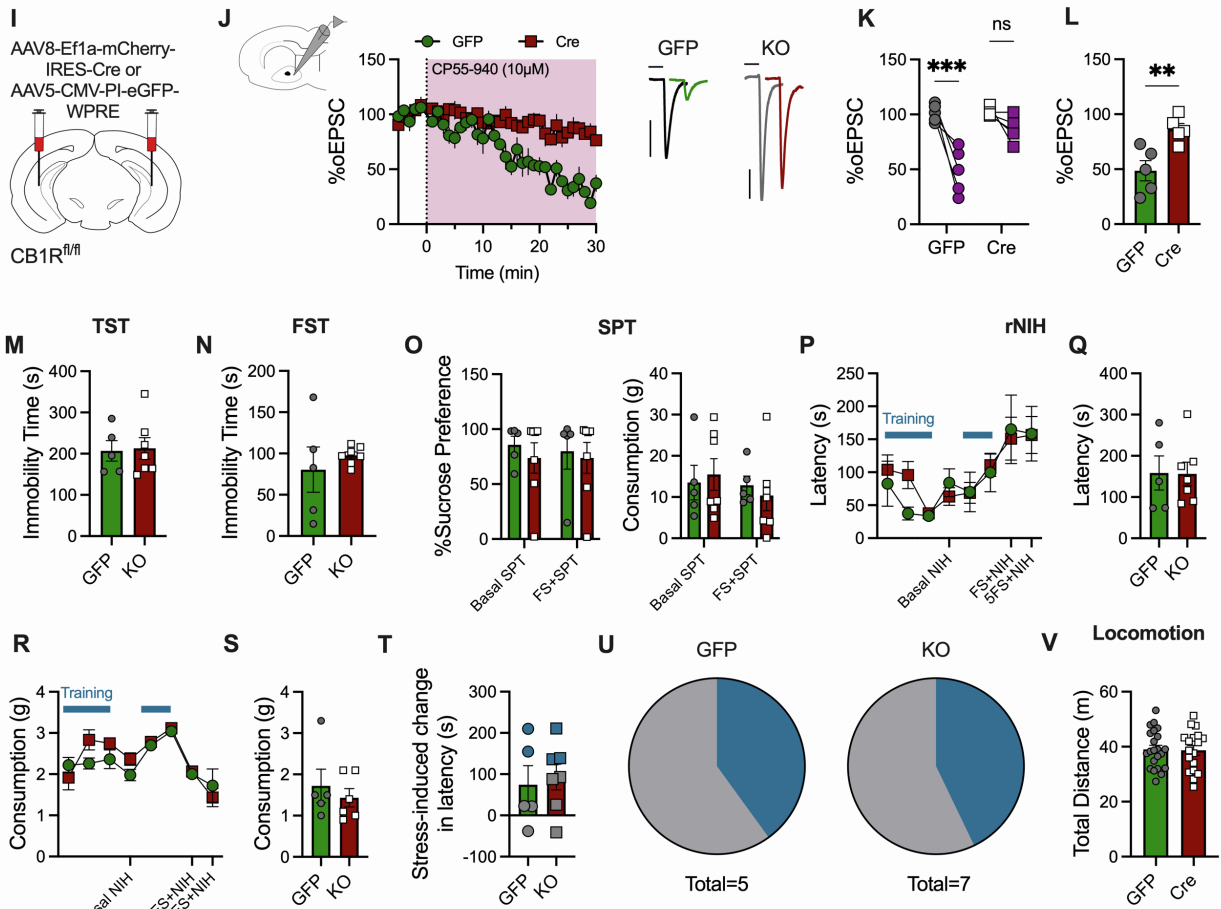

**Figure S3: vHPC<sup>CB1R</sup>-BLA KO has circuit-specific effects on stress adaptation (See Figure 3)**

- A) Representative merged images of INTRISCT viral strategy. Insets: red is Flpo-mCherry and green is fDIO-Cre; scale bar represents 300 $\mu$ m (left) and 100 $\mu$ m (right)
- B) Ex vivo electrophysiological recordings in the nucleus accumbens (NAc) of vHPC<sup>CB1R</sup>-BLA KO or control mice. vHPC-mediated oEPSC were stimulated and CP,55-940 (10 $\mu$ M) was bath applied. Time course demonstrated reduction in %oEPSC amplitude over time in both groups (5 cells from 3 mice GFP; 6 cells from 4 mice)
- C) Representative traces before and after (purple) CP,55-940 wash-on in GFP and KO mice
- D) Average %oEPSC amplitude reduction after CP,55940
- E) Average maximal %oEPSC depression from 3B
- F) Quantification of immobility time in tail suspension test (TST) (GFP: n=9; Cre: n=7)
- G) Average immobility time in forced swim test (FST) (GFP: n=6; Cre: n=5)
- H) Quantification of total distance travelled during open field test (n=10/group)
- I) Experimental design for global vHPC<sup>CB1R</sup> KO. A virus expressing Cre or GFP was injected bilaterally into the vHPC
- J) Ex vivo electrophysiological recordings in the NAc. vHPC-mediated oEPSCs were stimulated. Time course of %oEPSC amplitude over time course of CP-55,940 wash-on. (Right) Representative traces before and after CP-55,940 application in GFP (top) and KO (bottom) mice (n= 5 cells per group from n=3 mice/group)
- K) Average %oEPSC amplitude reduction after CP,55940 in Cre- and GFP-injected mice
- L) Average maximal %oEPSC depression from 3J
- M) Average immobility time during tail suspension test (TST) (GFP: n=5; Cre: n=7)
- N) Average immobility time during forced swim test (FST) (GFP: n=5; Cre: n=7)
- O) Average sucrose preference (left) and quantification of total consumption of sucrose solution and water (right) during sucrose preference test (SPT) (GFP: n=5; Cre: n=7)
- P) Feeding latency of Ensure over several days of rNIH (GFP: n=5; Cre: n=7)
- Q) Quantification of Ensure feeding latency following 5 days of footshock exposure
- R) Total Ensure consumption during NIH and training
- S) Average consumption of Ensure following 5 days of footshock
- T) Average stress-induced change in latency comparing latency after 5 days of footshock exposure to naïve NIH latency
- U) Proportion of stress susceptible and stress resilient mice based on stress-induced change in latency
- V) Total distance travelled during open field test (GFP: n=22; Cre: n=18)

Data were analyzed by 2-Way ANOVA (D, K, O-P, R), unpaired student's t-test (E-H, L-N, Q, S-T, V), or Chi-squared (U) performed for analysis. n=number of mice unless otherwise stated.
